# Supplementary material
Source: publisher site journal article supplement (https://www.dovepress.com/article/325788)
Supplement: Supplementary file 1 [file get_supplementary_file.php]

**Table S1.** The locations and putative functions of 39 SNPs for WISP1

| <b>Polymorphism</b> | <b>Location</b> | <b>Function consequence</b>          |
|---------------------|-----------------|--------------------------------------|
| rs2929970           | chr8:133228894  | Non-Coding Transcript Variant        |
| rs116716037         | chr8:133191093  | Non-Coding Transcript Variant        |
| rs2929973           | chr8:133230265  | Non-Coding Transcript Variant        |
| rs2013146           | chr8:133190749  | 2KB_upstream_variant                 |
| rs2929946           | chr8:133208448  | Intron Variant                       |
| rs2977529           | chr8:133202663  | Intron Variant                       |
| rs2977530           | chr8:133202869  | Intron Variant                       |
| rs4330674           | chr8:133209259  | Intron Variant                       |
| rs2977536           | chr8:133207034  | Intron Variant                       |
| rs16904853          | chr8:133220060  | Intron Variant                       |
| rs2929965           | chr8:133223573  | Intron Variant                       |
| rs2977519           | chr8:133196596  | Intron Variant                       |
| rs10956697          | chr8:133218539  | Intron Variant                       |
| rs3739261           | chr8:133227527  | Synonymous Variant                   |
| rs3739262           | chr8:133193470  | Intron Variant                       |
| rs16893344          | chr8:133194036  | Intron Variant                       |
| rs10956696          | chr8:133214636  | Intron Variant, 2KB Upstream Variant |
| rs112897791         | chr8:133185739  | none                                 |
| rs11778573          | chr8:133216687  | Intron Variant                       |
| rs138013484         | chr8:133227855  | Non-Coding Transcript Variant        |
| rs142461254         | chr8:133228351  | Non-Coding Transcript Variant        |
| rs146162433         | chr8:133229173  | Non-Coding Transcript Variant        |
| rs16904845          | chr8:133187533  | none                                 |
| rs2013158           | chr8:133190699  | 2KB_upstream_variant                 |
| rs2929969           | chr8:133228454  | Non-Coding Transcript Variant        |
| rs2929986           | chr8:133199283  | Intron Variant                       |
| rs2977537           | chr8:133207820  | Intron Variant                       |
| rs2977549           | chr8:133229790  | Non-Coding Transcript Variant        |
| rs2977551           | chr8:133231307  | Non-Coding Transcript Variant        |
| rs35472615          | chr8:133185294  | none                                 |

---

|            |                |                                               |
|------------|----------------|-----------------------------------------------|
| rs4265166  | chr8:133228843 | Non-Coding Transcript Variant                 |
| rs62514003 | chr8:133185953 | none                                          |
| rs62514004 | chr8:133190246 | 2KB_upstream_variant                          |
| rs72731505 | chr8:133186717 | none                                          |
| rs72731507 | chr8:133187795 | none                                          |
| rs754958   | chr8:133226528 | Intron Variant                                |
| rs7828685  | chr8:133212736 | Intron Variant: Non-Coding Transcript Variant |
| rs7843546  | chr8:133186058 | none                                          |

---

Abbreviations: chr: chromosome; WISP1: Wnt-induce signaling pathway protein 1
